# Supplementary material
Source: HighWire-hosted journal article supplement (https://bmjopenquality.bmj.com/highwire/filestream/136064/field_highwire_adjunct_files/0/ds3216.docx)
Supplement: ds3216.docx [file ds3216.docx]

Pre-intervention questionnaire results: Surgical handover project

1) Are you responsible for maintaining the surgical handover list for your firm?

100% response rate from Upper GI firm junior faculty (Ross Kenny, Natalie Elkheir, Nik Dziaduduisz)

2) How long each morning on average do you spend updating the surgical list?

**Result: 20 minutes**

3) How long each evening on average do you spend updating the surgical list?

**Result: 75 minutes**

**Total daily time spent editing list: 95 minutes**

4) On a scale of 1-10, how easy is it to update the list? (1 = very easy, 10 = extremely difficult)

**Result: 7 / 10**

5) On a scale of 1-10 how easy is it to add new patients onto the list? (1 = very easy, 10 = extremely difficult)

**Result: 6 / 10**

6) On average how often do you experience problems formatting the list?

**Result: Daily**

7) Are you satisfied with the current list format?

**Result: Yes = 0 No = 100%**

8) In a few words, please outline what changes, if any, you think need to be made to the list?

- Unification of all the wards into one single table that is easy to delete/add patients to
- Easier to add blood results/ add patients

9) Are you satisfied with the general surgical weekend handover list format?

**Result: Yes = 0 No = 100%**

10) In a few words, please outline what changes, if any, you think need to be made to the surgical weekend handover list?

- Standard formatting
- Patients are constantly in the wrong order with different teams adding their patients ad-hoc
- Clearer plans
